# Supplementary material for: Five compounds based on [TeMo6O24]6− and [β-Mo8O26]4− anions synthesized by using different symmetrical and asymmetric N-donor ligands
Source: Royal Society of Chemistry journal article supplement (doi:10.1039/d1ce00775k), 2021-01-01
Supplement: d1ce00775k1.pdf [file d1ce00775k1.pdf]

## Five compounds based on $[\text{TeMo}_6\text{O}_{24}]^{6-}$ and $[\beta\text{-Mo}_8\text{O}_{26}]^{4-}$ anions by using different symmetrical and asymmetric N- donor ligands

Jun Ying,\* Chenxi Sun, Liang Jin, Aixiang Tian, Xiuli Wang\*

**Table S1.** Selected bond lengths (Å) and angles (°) of compounds 1–5.

### Compound 1

|                     |           |                    |            |
|---------------------|-----------|--------------------|------------|
| Cu(1)-N(2)          | 1.982(3)  | Cu(1)-N(4) #3      | 1.997(3)   |
| Cu(1)-O(6)          | 2.403(3)  | Cu(1)-O(13)        | 1.903(2)   |
| Cu(2)-N(1) #2       | 2.047(3)  | Cu(2)-O(13)        | 1.909(2)   |
| O(13)-Cu(1)-O(6)    | 95.53(11) | O(13)-Cu(1)-N(2)   | 88.48(11)  |
| O(13)-Cu(1)-N(4) #3 | 93.65(11) | O(4)-Cu(1)-O(6)    | 88.55(9)   |
| O(4)-Cu(1)-N(4) #3  | 89.46(11) | N(2)-Cu(1)-N(4) #3 | 175.30(12) |
| N(2)-Cu(1)-O(6)     | 89.58(11) | O(13)-Cu(2)-N(1)   | 87.37(10)  |

Symmetry codes for **1**: #1 1-X, 1-Y, 1-Z; #2 -X, 1-Y, 1-Z; #3 +X, 1-Y, -1/2+Z

### Compound 2

|                  |            |                  |           |
|------------------|------------|------------------|-----------|
| Cu(1)-O(12)      | 1.970(2)   | Cu(1)-N(3)       | 2.032(3)  |
| Cu(1)-N(2)       | 1.995(3)   | Cu(1)-N(1)       | 2.000(3)  |
| O(12)-Cu(1)-N(3) | 174.58(11) | O(12)-Cu(1)-N(1) | 94.48(11) |
| O(12)-Cu(1)-N(2) | 93.67(11)  | N(2)-Cu(1)-N(3)  | 85.76(11) |
| N(2)-Cu(1)-N(1)  | 168.41(13) | N(1)-Cu(1)-N(3)  | 85.35(12) |

Symmetry codes for **2**: #1 1-X, 1-Y, 1-Z

### Compound 3

|                      |          |                    |          |
|----------------------|----------|--------------------|----------|
| Cu(1)-N(1) #2        | 1.968(6) | Cu(1)-N(3) #3      | 2.027(7) |
| Cu(1)-N(2)           | 1.978(7) | N(1)-C(2)          | 1.331(9) |
| N(1)#2-Cu(1)-N(3) #3 | 118.9(3) | N(1) #2-Cu(1)-N(2) | 129.7(3) |
| N(2)-Cu(1)-N(3) #3   | 108.9(3) | C(2)-N(1)-Cu(1) #4 | 120.7(6) |
| C(1)-N(1)-Cu(1) #4   | 119.8(5) | C(2)-N(1)-C(1)     | 117.2(6) |

Symmetry codes for **3**: #1 5/2-X, 1/2-Y; #2 +X, 1-Y, -1/2+Z; #3 2-X, +Y, 1/2-Z

### Compound 4

|                    |            |                   |           |
|--------------------|------------|-------------------|-----------|
| Cu(1)-O1W          | 1.949(4)   | Cu(1)-O2W         | 1.986(4)  |
| Cu(1)-N(4) #2      | 1.944(4)   | Cu(1)-N(1)        | 1.958(4)  |
| O1W-Cu(1)-O2W      | 164.36(17) | O1W-Cu(1)-N(1)    | 89.82(16) |
| N(4) #2-Cu(1)-O2W  | 91.82(16)  | N(4) #2-Cu(1)-O1W | 88.92(16) |
| N(4) #2-Cu(1)-N(1) | 173.55(18) | N(1)-Cu(1)-O2W    | 91.10(16) |

Symmetry codes for **4**: #1 2-X,1-Y,1-Z; #2 +X,+Y,1+Z

#### Compound **5**

|                     |            |                       |           |
|---------------------|------------|-----------------------|-----------|
| Cu(1)-O(25)         | 1.929(4)   | Cu(1)-O(12)           | 2.201(4)  |
| Cu(1)-N(1) #4       | 1.990(5)   | Cu(1)-N(2)            | 2.078(5)  |
| Cu(3)-O(22) #5      | 1.968(4)   | Cu(3)-O(15) #6        | 2.303(4)  |
| Cu(2)-O(25)         | 1.927(4)   | Cu(2)-N(3)            | 1.966(4)  |
| O(9) #3-Cu(1)-O(12) | 98.54(16)  | O(9) #3-Cu(1)-N(1) #4 | 87.86(17) |
| O(25)-Cu(1)-O(12)   | 97.23(17)  | N(1) #4-Cu(1)-O(12)   | 93.39(18) |
| O(22)-Cu(3)-O3W     | 90.19(17)  | O(22)-Cu(3)-O(15) #6  | 90.83(15) |
| O1W-Cu(2)-N(3)      | 174.72(19) | O(25)-Cu(2)-O1W       | 90.86(17) |

Symmetry codes for **5**: #1 2-X, 1-Y, 1-Z; #2 1-X, 1-Y, 2-Z; #3 1-X, 1-Y, 1-Z; #4 1-X, 2-Y, 1-Z; #5 2-X, 1-Y, 2-Z; #6 1+X, +Y, +Z

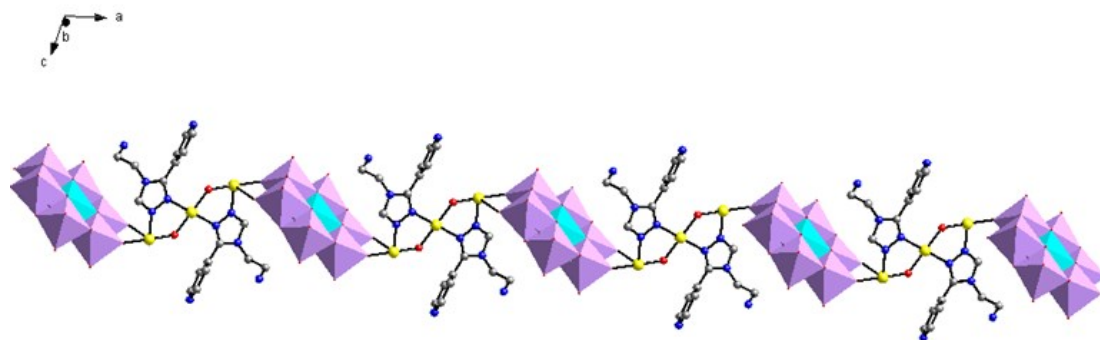

**Fig. S1.** The 1D chain of **1** with tri-nuclear Cu clusters linked by Anderson anions.

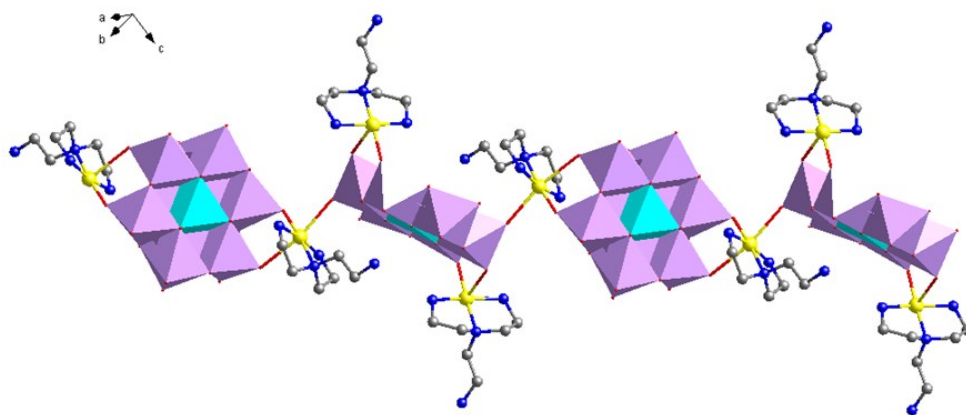

**Fig. S2.** The 1D chain of **2** with  $[\text{Cu}(\text{talm})]^{2+}$  subunits linked by Anderson anions.

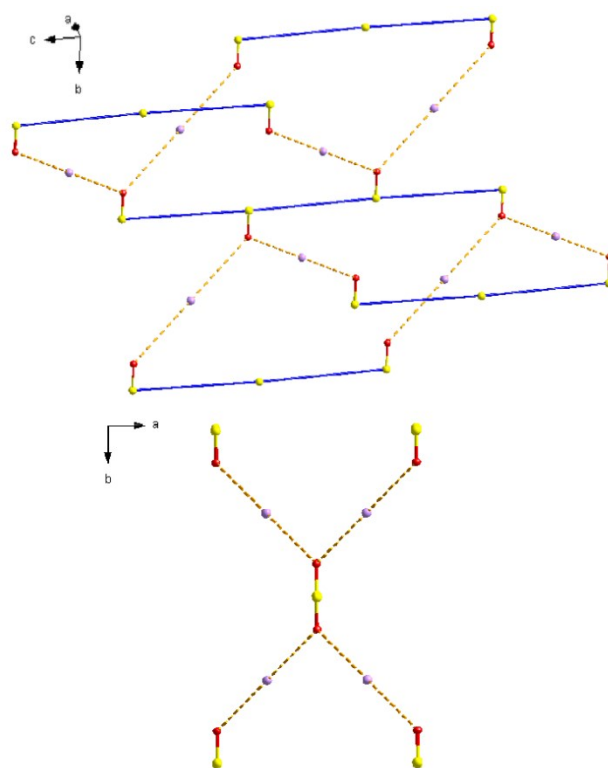

**Fig. S3.** The 2D topological structure connected by hydrogen bonds of compound **2** and the topology along  $ab$  plane.  $\beta\text{-Mo}_8$  (purple), Ptep ligand (blue), Cu (yellow), O (red).

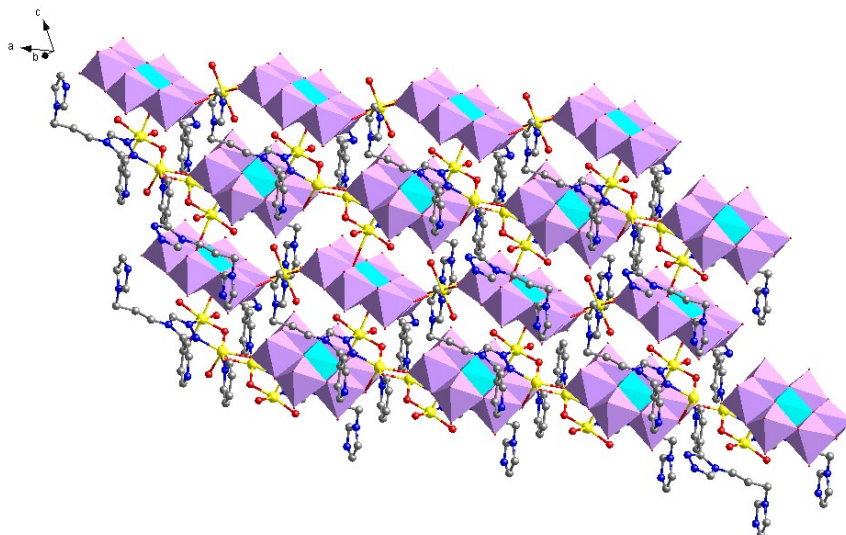

**Fig. S4.** The 2D sheet structure of **5**.

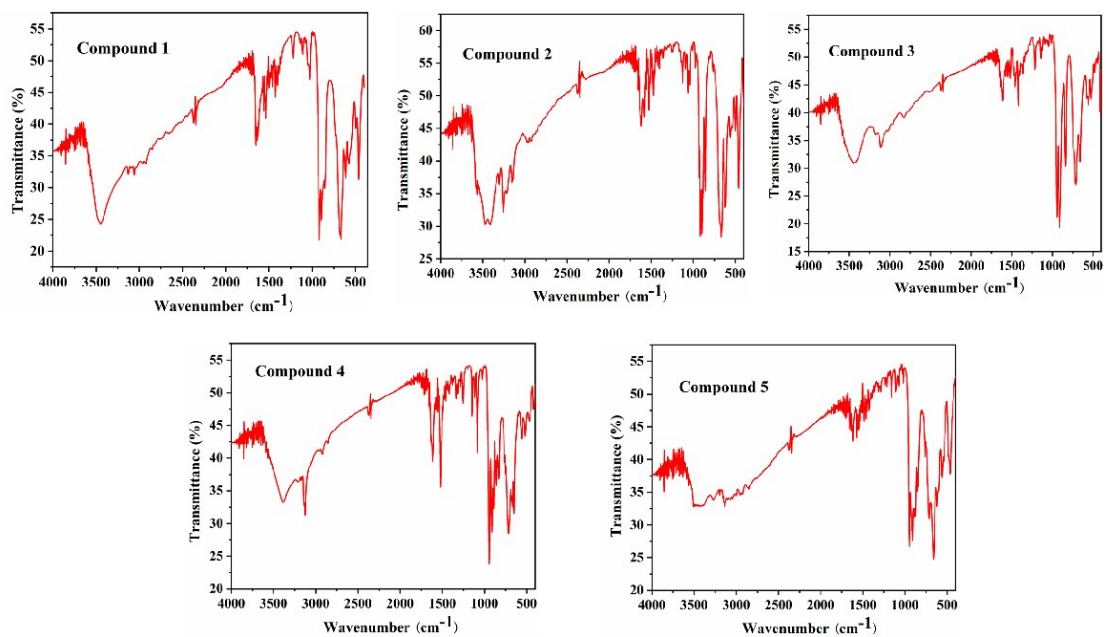

**Fig. S5.** The IR spectra of compounds **1–5**.

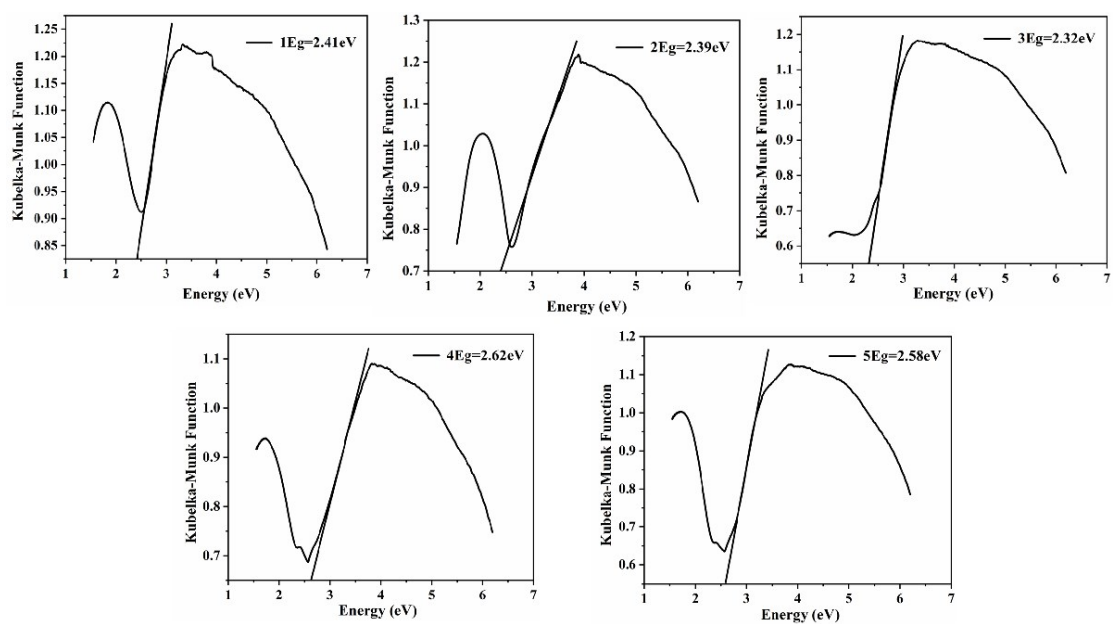

**Fig. S6.** The solid-state optical diffuse-reflectance spectra of compounds 1–5.

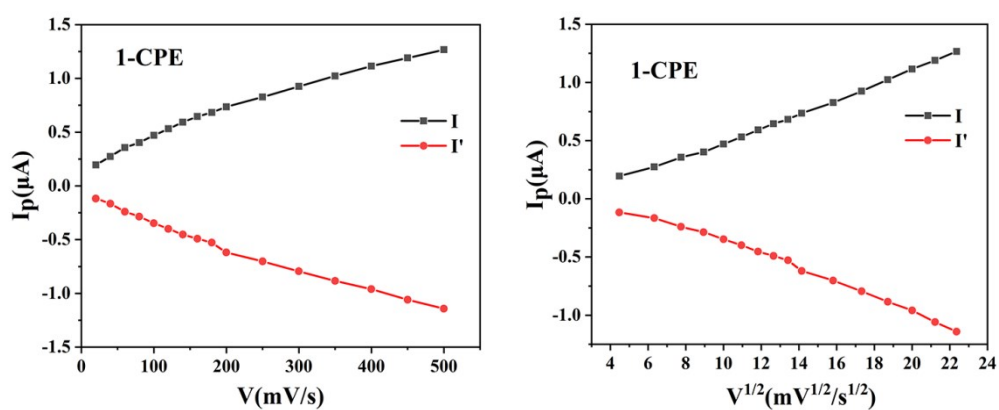

**Fig. S7.** The dependence of anodic peak and cathodic peak currents of 1–CPE on scan rates.

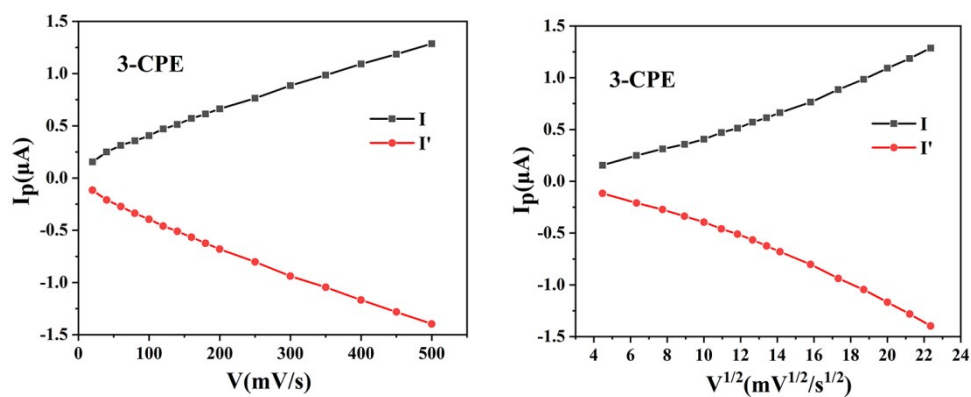

**Fig. S8.** The dependence of anodic peak and cathodic peak currents of 3–CPE on scan rates.

rates.

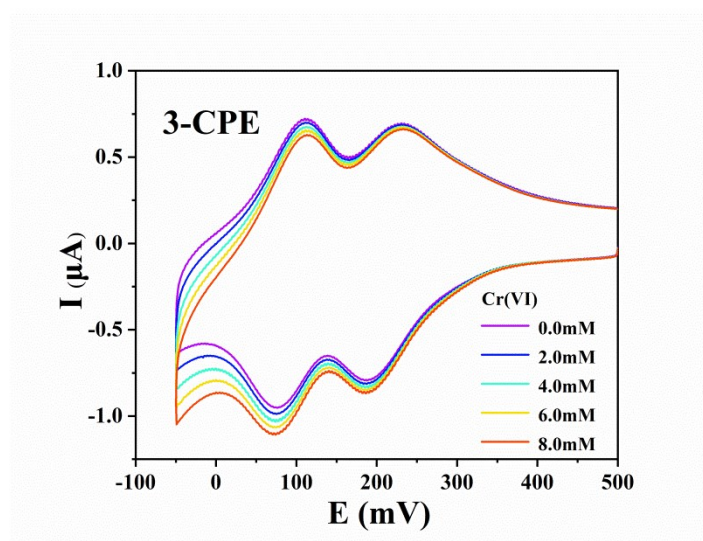

**Fig. S9.** Cyclic voltammograms of the 3-CPE in 0.1 M  $\text{H}_2\text{SO}_4$  + 0.5 M  $\text{Na}_2\text{SO}_4$  aqueous solution containing 0–8 mM Cr(VI). Scan rate:  $200 \text{ mV} \cdot \text{s}^{-1}$ .

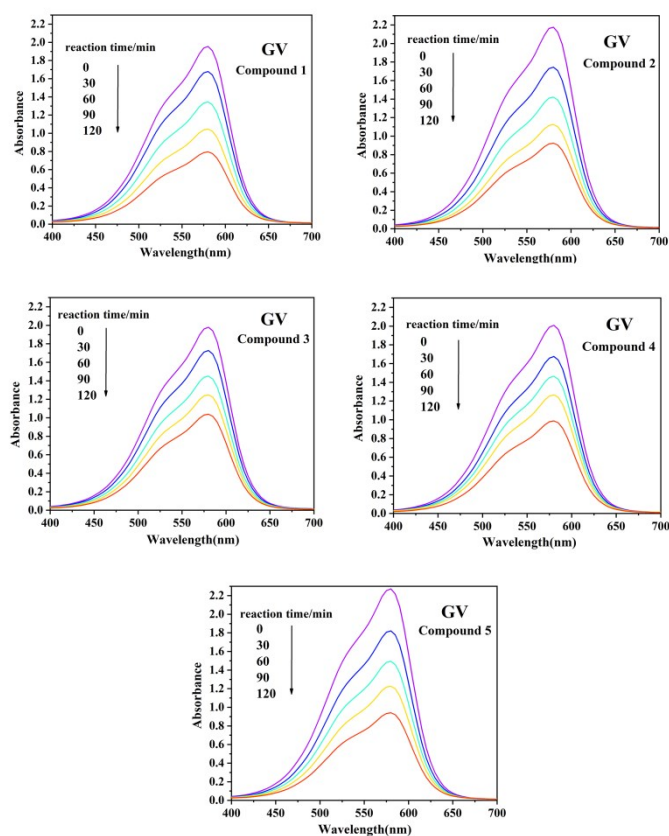

**Fig. S10.** The absorption spectra of GV solution during the decomposition reaction under UV irradiation with compounds 1–5 as the catalyst.

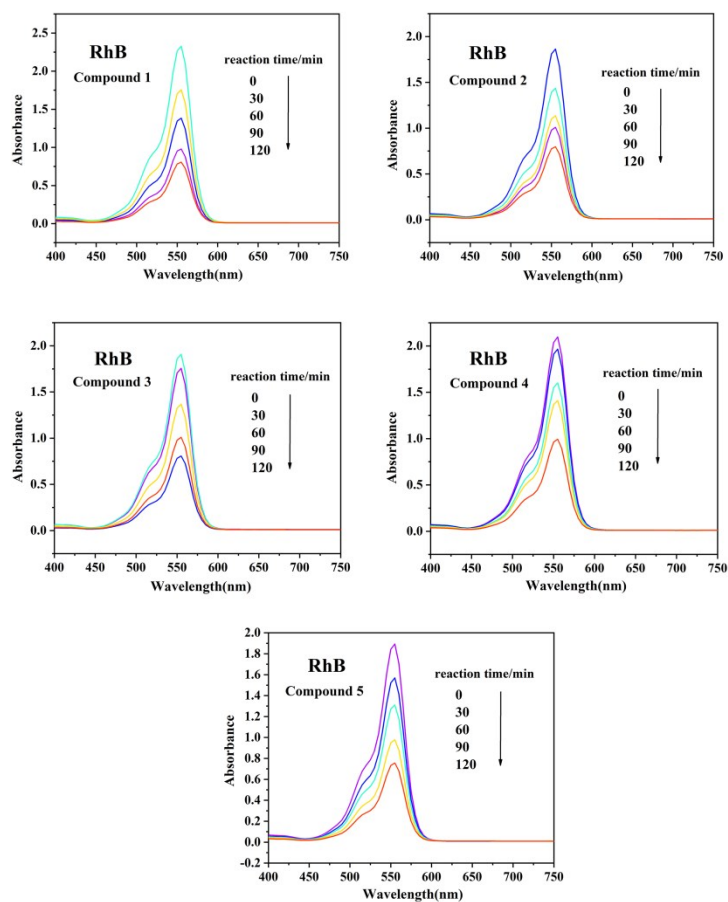

**Fig. S11.** The absorption spectra of RhB solution during the decomposition reaction under UV irradiation with compounds 1–5 as the catalyst.

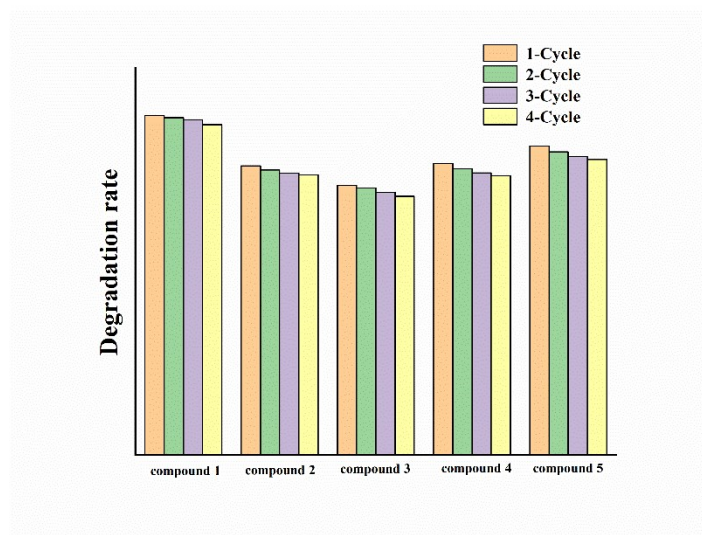

**Fig. S12.** Four cycles of photocatalytic degradation of compounds 1–5.

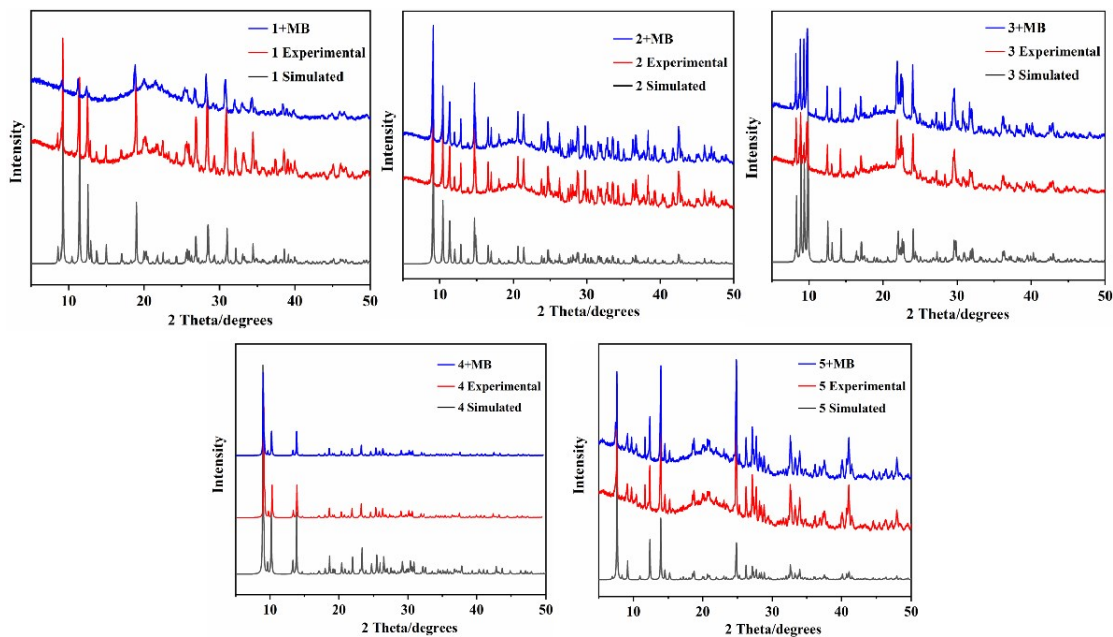

**Fig. S13.** The PXRD spectra of compounds 1–5.

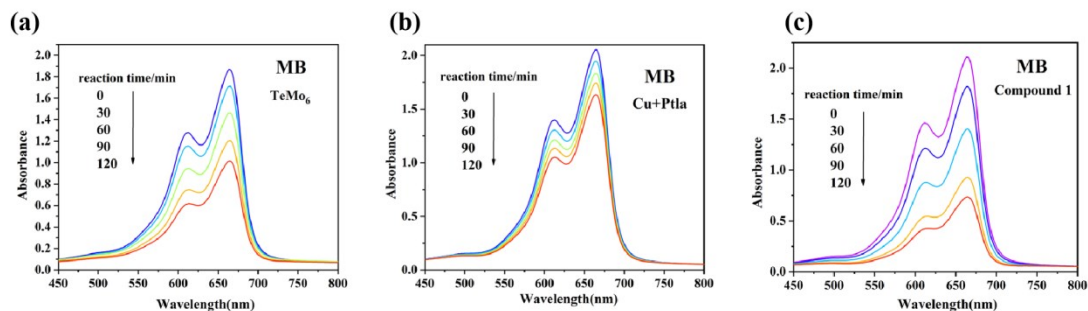

**Fig. S14.** Under UV irradiation, the absorption spectrum of MB solution after adding  $(\text{NH}_4)_6[\text{TeMo}_6\text{O}_{24}] \cdot 7\text{H}_2\text{O}$ (a), metal organic unit(b), and compound 1(c).



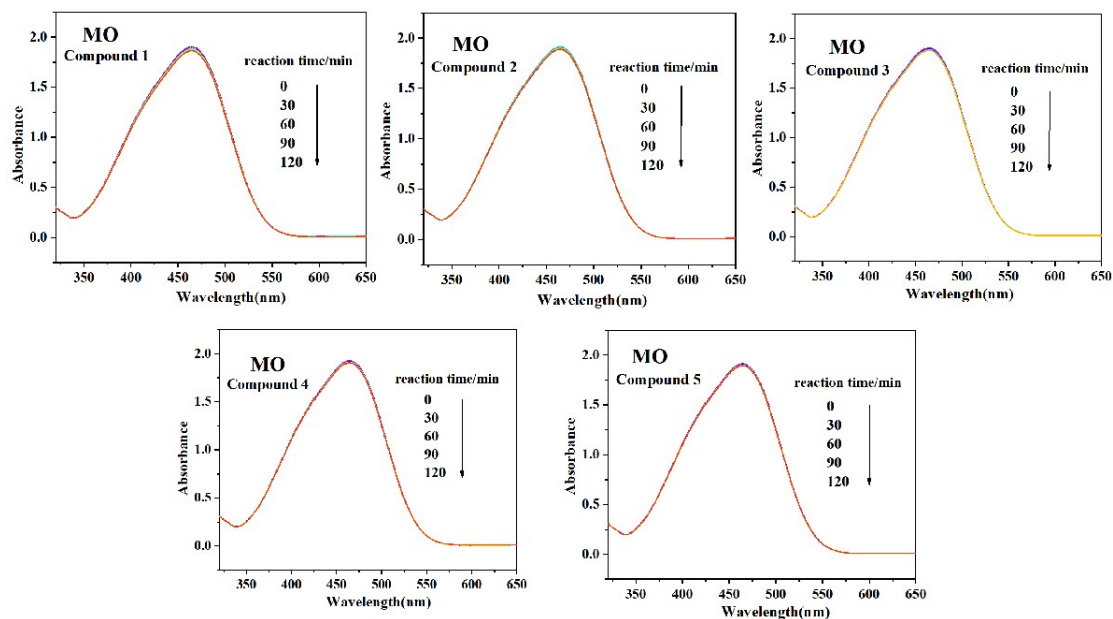

**Fig. S15.** The absorption spectra of the MO solution with the compounds 1–5 as the catalyst.

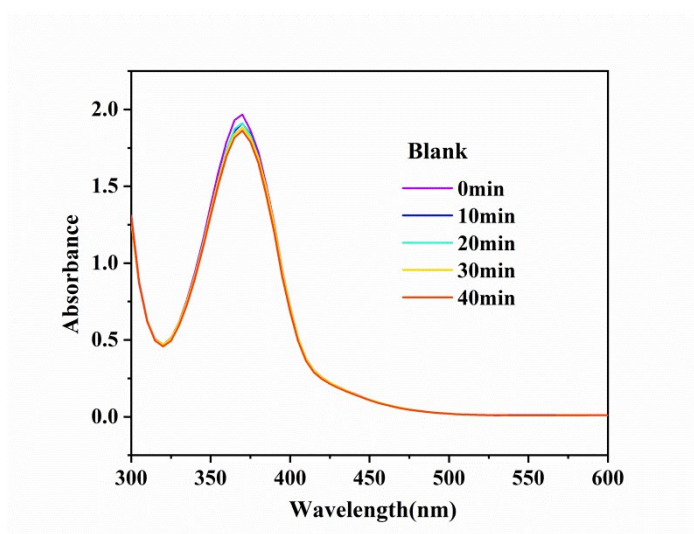

**Fig. S16.** UV spectra of the Cr(VI) solution without compounds used as the photoreduction catalysts.

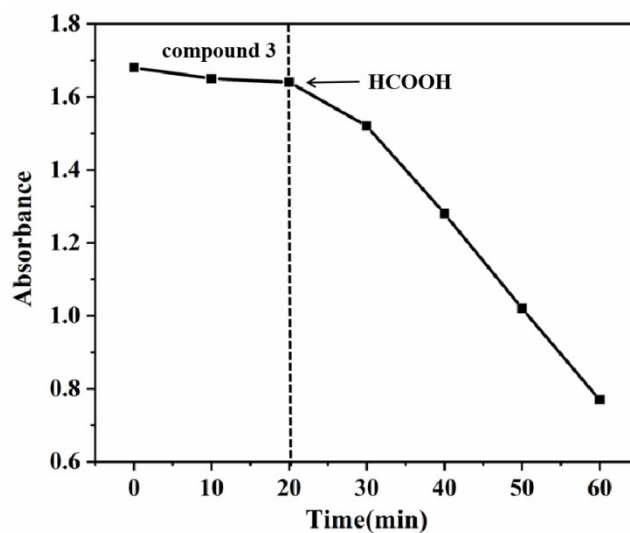

**Fig. S17.** Comparative experiment of compound 3 catalytic reduction Cr(VI): no formic acid was added in the first 20 minutes, and formic acid was added after 20 minutes.

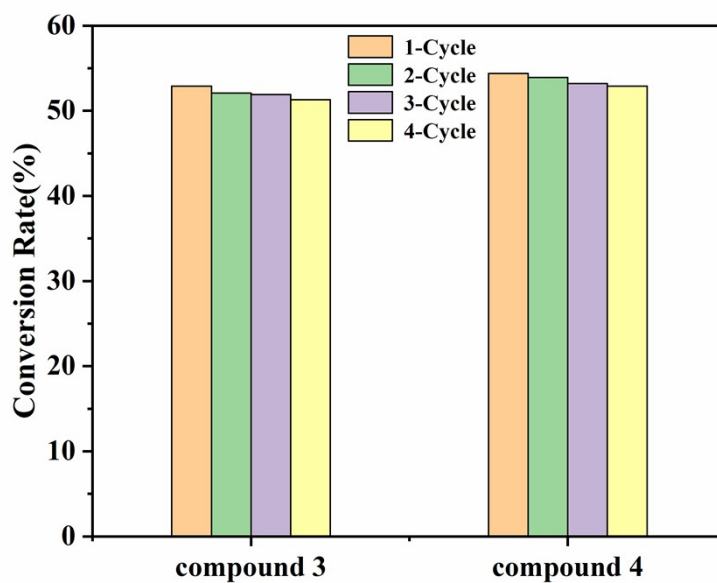

**Fig. S18.** Four cycles of photocatalytic reduction of compounds 3 and 4.
